# Supplementary material
Source: publisher figshare collection journal article supplement (https://acs.figshare.com/ndownloader/files/18027860)
Supplement: Supplementary file 1 [file 18027860]

## Supporting Information

**Non-precious catalyst for three-phase contact in Proton Exchange Membrane CO<sub>2</sub>  
conversion full cell for efficient electrochemical reduction of carbon dioxide**

***Sreetama Ghosh, Meenakshi Seshadhri Garapati<sup>†</sup>, Arpita Ghosh<sup>†</sup> and Ramaprabhu Sundara\****

*Alternative Energy and Nanotechnology Laboratory (AENL), Nano Functional Materials  
Technology Center (NFMTC), Department of Physics, Indian Institute of Technology Madras,  
Chennai 600036, India; \*Phone: +91-44-22574862; fax: +91-44-22570509.*

*\*E-mail: [ramp@iitm.ac.in](mailto:ramp@iitm.ac.in)*

<sup>†</sup> These authors have equal contribution

**Table S1** Standard electrochemical reduction potentials.

| Reactions                                      | E <sup>0</sup> (V) vs NHE at pH 7 |
|------------------------------------------------|-----------------------------------|
| $CO_2 + e^- \rightarrow CO_2^{\cdot -}$        | -1.90                             |
| $CO_2 + 2H^+ + 2e^- \rightarrow HCOOH$         | -0.61                             |
| $CO_2 + 2H^+ + 2e^- \rightarrow CO + H_2O$     | -0.52                             |
| $CO_2 + 4H^+ + 4e^- \rightarrow HCHO + H_2O$   | -0.48                             |
| $CO_2 + 6H^+ + 6e^- \rightarrow CH_3OH + H_2O$ | -0.38                             |
| $CO_2 + 8H^+ + 8e^- \rightarrow CH_4 + 2H_2O$  | -0.24                             |
| $2H^+ + 2e^- \rightarrow H_2$                  | -0.41                             |

**Table S2** Comparison of the present work with reported literature.

| <b>Materials</b>                | <b>Cell</b>                                       | <b>Main product</b> | <b>F.E. (%)</b> | <b>Stability (h)</b> | <b>Ref.</b>             |
|---------------------------------|---------------------------------------------------|---------------------|-----------------|----------------------|-------------------------|
| NCNTs                           | Flow cell                                         | CO                  | 80              | 10                   | 1                       |
| N-graphene                      | H-cell                                            | HCOOH               | 66              | 4                    | 2                       |
| PEI-NCNTs                       | H-cell                                            | HCOOH               | 87              | 24                   | 3                       |
| Au/NC                           | H-cell                                            | CO                  | ~ 83            | 2                    | 4                       |
| Fe-N-C                          | H-cell                                            | CO                  | 85              | -                    | 5                       |
| Fe-N-C                          | H-cell                                            | CO                  | 91              | 6                    | 6                       |
| Ni-N-C                          | H-cell                                            | CO                  | 71.9            | 60                   | 7                       |
| Sn-N-C                          | H-cell                                            | HCOOH               | 74.3            | 200                  | 8                       |
| Fe-N <sub>4</sub> -<br>graphene | H-cell                                            | CO                  | ~ 80            | 10                   | 9                       |
| <b>Fe<sub>3</sub>C@NCNTs</b>    | <b>PEM CO<sub>2</sub><br/>conversion<br/>cell</b> | <b>HCOOH</b>        | <b>~ 90</b>     | <b>24</b>            | <b>Present<br/>work</b> |

**Table S3** Elemental compositions of Fe<sub>3</sub>C@NCNTs and NCNTs has been determined by XPS.

| Samples                 | Elemental composition (at %) |      |       |      |
|-------------------------|------------------------------|------|-------|------|
|                         | C 1s                         | N 1s | Fe 2p | O 1s |
| Fe <sub>3</sub> C@NCNTs | 91.6                         | 4.2  | 1.8   | 2.4  |
| NCNTs                   | 93.2                         | 4.8  | -     | 2    |

An appreciably high N-doping of 4.8 at % was obtained for NCNTs and around 4.2 at % was obtained for Fe<sub>3</sub>C@NCNTs. XPS revealed low surface metal contents in all the samples in comparison to that obtained by ICP-OES implying that XPS measurement was only sensitive to surface elements and in most of the cases the metal nanoparticles were encapsulated by carbon layers.

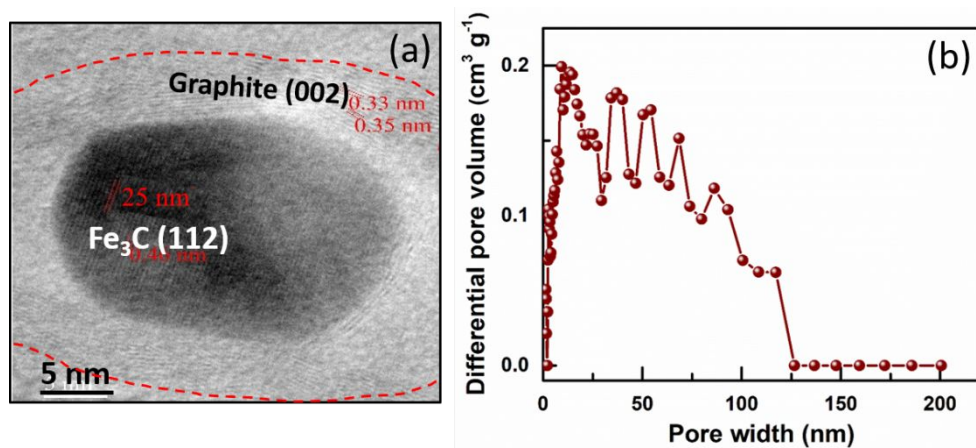

**Figure S1.** (a) HRTEM image of Fe<sub>3</sub>C@NCNTs (red dashed lines, shown on either side, distinguish between the graphitic coating on the encapsulated nanoparticle and the amorphous carbon substrate) and (b) NLDFIT pore-size distribution curve of Fe<sub>3</sub>C@NCNTs.

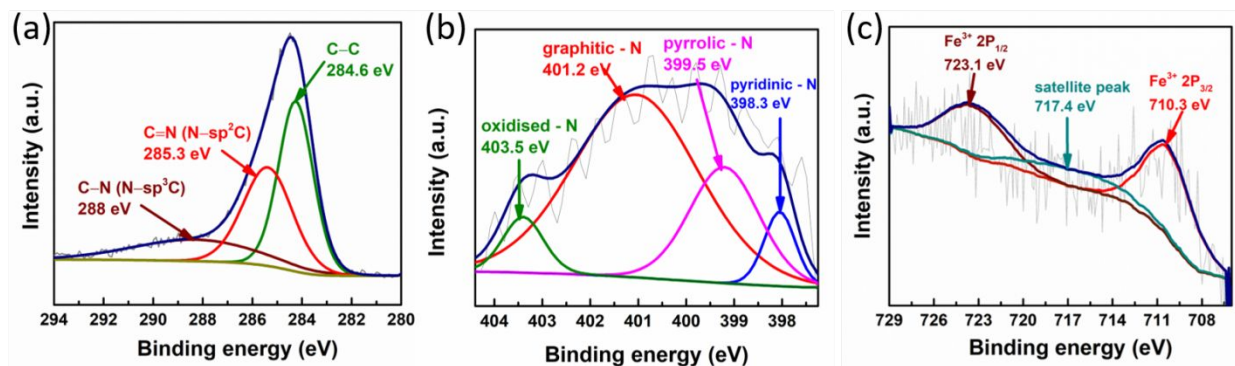

**Figure S2.** High resolution XPS spectra of (a) C 1s, (b) N 1s, (c) Fe 2p respectively of Fe<sub>3</sub>C@NCNTs.

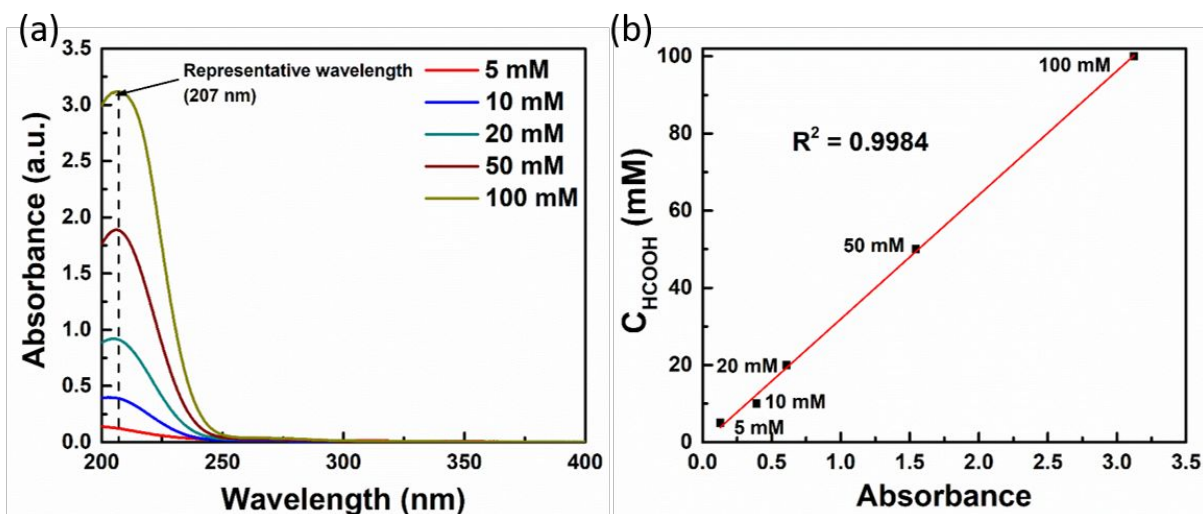

**Figure S3.** Quantification of formic acid formed from CO<sub>2</sub> reduction by UV spectroscopy, (a) UV-Vis absorption spectra for different concentrations of commercial formic acid and (b) Calibration curve for the measurement of formic acid generated by CO<sub>2</sub> electroreduction.

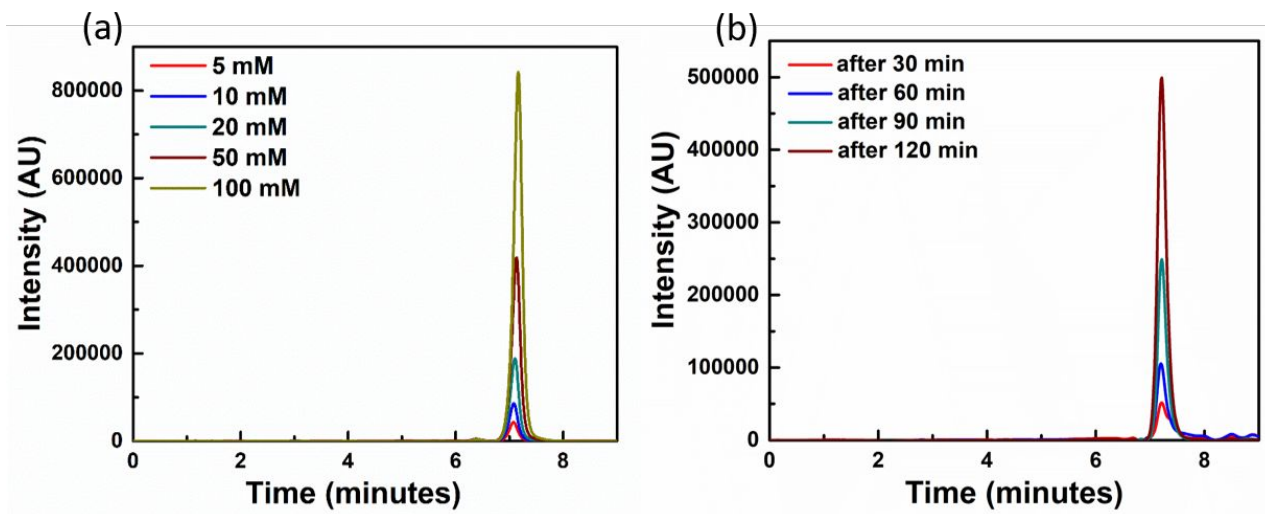

**Figure S4.** (a) Chromatograms with standard formic acid solutions and (b) HPLC product analysis results of liquid phase samples generated from electrochemical CO<sub>2</sub> reduction with Fe<sub>3</sub>C@NCNTs on both anode as well as cathode. HCOOH peak appears in both at a retention time of 7.2 min.

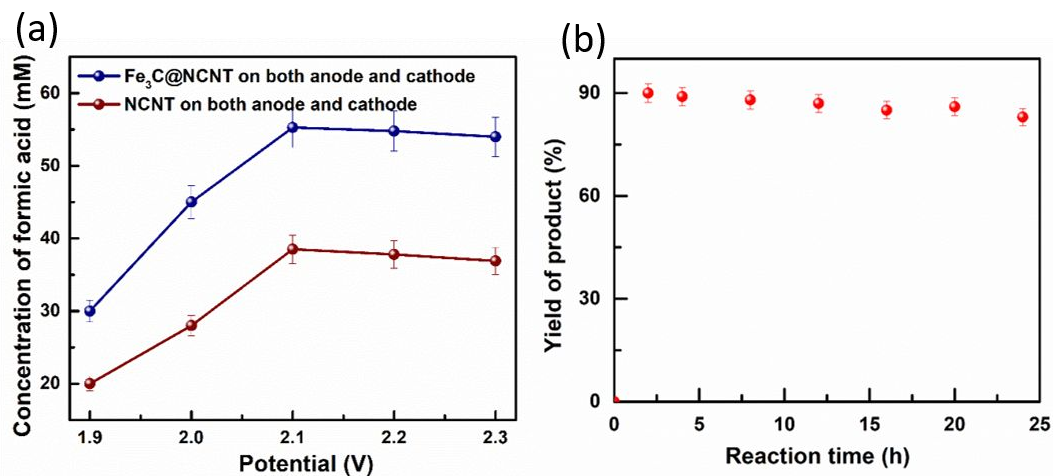

**Figure S5.** (a) Determination of working potential for PEM CO<sub>2</sub> conversion cell after 120 min conversion time for each data and (b) durability test of full cell system for continuous formic acid formation with Fe<sub>3</sub>C@NCNTs on both anode as well as cathode.

## References:

- (1) Wu, J.; Yadav, R. M.; Liu, M.; Sharma, P. P.; Tiwary, C. S.; Ma, L.; Zou, X.; Zhou, X.-D.; Yakobson, B. I.; Lou, J.; Ajayan, P. M.; Achieving Highly Efficient, Selective, and Stable CO<sub>2</sub> Reduction on Nitrogen-Doped Carbon Nanotubes. *ACS Nano* **2015**, *9* (5), 5364–5371.
- (2) Wang, H.; Chen, Y.; Hou, X.; Ma, C.; Tan, T. Nitrogen-Doped Graphenes as Efficient Electrocatalysts for the Selective Reduction of Carbon Dioxide to Formate in Aqueous Solution. *Green Chem.* **2016**, *18* (11), 3250–3256.
- (3) Zhang, S.; Kang, P.; Ubnoske, S.; Brennaman, M. K.; Song, N.; House, R. L.; Glass, J. T.; Meyer, T. J. Polyethylenimine-Enhanced Electrocatalytic Reduction of CO<sub>2</sub> to Formate at Nitrogen-Doped Carbon Nanomaterials. *J. Am. Chem. Soc.* **2014**, *136* (22), 7845–7848.
- (4) Jin, L.; Liu, B.; Wang, P.; Yao, H.; Achola, L. A.; Kerns, P.; Lopes, A.; Yang, Y.; Ho, J.; Moewes, A.; Pei, Y.; He, J.; Ultrasmall Au Nanocatalysts Supported on Nitrided Carbon for Electrocatalytic CO<sub>2</sub> Reduction: The Role of the Carbon Support in High Selectivity. *Nanoscale* **2018**, *10* (30), 14678–14686.
- (5) Leonard, N.; Ju, W.; Sinev, I.; Steinberg, J.; Luo, F.; Varela, A. S.; Roldan Cuenya, B.; Strasser, P. The Chemical Identity, State and Structure of Catalytically Active Centers during the Electrochemical CO<sub>2</sub> Reduction on Porous Fe-Nitrogen-Carbon (Fe-N-C) Materials. *Chem. Sci.* **2018**, *9* (22), 5064–5073.
- (6) Huan, T. N.; Ranjbar, N.; Rousse, G.; Sougrati, M.; Zitolo, A.; Mougél, V.; Jaouen, F.; Fontecave, M. Electrochemical Reduction of CO<sub>2</sub> Catalyzed by Fe-N-C Materials: A Structure–Selectivity Study. *ACS Catal.* **2017**, *7* (3), 1520–1525.
- (7) Zhao, C.; Dai, X.; Yao, T.; Chen, W.; Wang, X.; Wang, J.; Yang, J.; Wei, S.; Wu, Y.; Li, Y. Ionic Exchange of Metal-Organic Frameworks to Access Single Nickel Sites for Efficient Electroreduction of CO<sub>2</sub>. *J. Am. Chem. Soc.* **2017**, *139* (24), 8078–8081.
- (8) Zu, X.; Li, X.; Liu, W.; Sun, Y.; Xu, J.; Yao, T.; Yan, W.; Gao, S.; Wang, C.; Wei, S.; Xie, Y.; Efficient and Robust Carbon Dioxide Electroreduction Enabled by Atomically

Dispersed  $\text{Sn}^{\delta+}$  Sites. *Adv. Mater.* **2019**, *31* (15), 1–8.

- (9) Gu, J.; Hsu, C. S.; Bai, L.; Chen, H. M.; Hu, X. Atomically Dispersed  $\text{Fe}^{3+}$  Sites Catalyze Efficient  $\text{CO}_2$  Electroreduction to CO. *Science*. **2019**, *364* (6445), 1091–1094.
